# Supplementary material for: Percutaneous cannulation for cardiopulmonary bypass in minimally invasive surgery is associated with reduced groin complications
Source: Oxford University Press journal article supplement (doi:10.1093/icvts/ivx140), 2017-04-20
Supplement: Supplementary_Table_1_20170317_ivx140.docx [file Supplementary_Table_1_20170317_ivx140.docx]

**Supplementary Table 1: Preoperative characteristics of patients who underwent groin cannulation for CPB either by femoral cutdown (Cutdown) or percutaneously with use of arterial closure devices (ACD) during the period 2010-2011:**

|  | **Cutdown**  **(n=82)** | **ACD**  **(n=100)** | **p value** |
| --- | --- | --- | --- |
| Male | 43 (52.4%) | 56 (56.0%) | 0.63 |
| Age (years) | 64 (SD: 13) | 65 (SD: 11) | 0.57 |
| Diabetes | 19 (23.2%) | 17 (17.0%) | 0.30 |
| Ejection fraction (%) | 56 (SD: 16) | 59 (SD: 13) | 0.16 |
| BMI (kg/m²) | 27.3 (SD: 5) | 26.8 (SD: 5) | 0.50 |
| Arterial Hypertension | 67 (81.7%) | 70 (70.0%) | 0.069 |
| Immunosuppression | 2 (2.4%) | 6 (6.0%) | 0.30 |
| Atrial fibrillation | 15 (18.3%) | 30 (30.0%) | 0.069 |
| Periferal artery disease | 1 (1.2%) | 0 (0.0%) | 0.45 |
| Endocarditis | 3 (3.7%) | 10 (10.0%) | 0.15 |
| Dialysis | 4 (4.9%) | 5 (5.0%) | 1.00 |
| Warfarin | 15 (18.3%) | 30 (30%) | 0.069 |
| Previous Cardiac Operation | 2 (2.4%) | 8 (8.0%) | 0.19 |
| Logistic Euroscore (%) | 7.9 (SD: 8.1) | 8.6 (SD: 9.2) | 0.59 |

Data are presented as n (%) or mean (standard deviation); BMI = body mass index; SD = standard deviation
